# Supplementary material
Source: publisher site journal article supplement (https://www.dovepress.com/article/409466)

**Supplementary material**

**Supplementary Table 1.** Gender and geographical distribution of the Delphi panel members

| Region of Spain | Male  n (%) | Female  n (%) | Total  n (%) |
| --- | --- | --- | --- |
| Andalusia | 16 (30.2) | 31 (21.8) | 47 (24.1) |
| Aragón | 0 (0.0) | 1 (0.7) | 1 (0.5) |
| Asturias | 0 (0.0) | 1 (0.7) | 1 (0.5) |
| Balearic islands | 0 (0.0) | 2 (1.4) | 2 (1.0) |
| Basque country | 2 (3.8) | 4 (2.8) | 6 (3.1) |
| Canary islands | 2 (3.8) | 5 (3.5) | 7 (3.6) |
| Cantabria | 1 (1.9) | 0 (0.0) | 1 (0.5) |
| Castilla and León | 5 (9.4) | 14 (9.9) | 19 (9.7) |
| Castilla-La Mancha | 1 (1.9) | 2 (1.4) | 3 (1.5) |
| Catalonia | 3 (5.7) | 7 (4.9) | 10 (5.1) |
| Extremadura | 1 (1.9) | 12 (8.5) | 13 (6.7) |
| Galicia | 3 (5.7) | 19 (13.4) | 22 (11.3) |
| Community of Madrid | 8 (15.1) | 25 (17.6) | 33 (16.9) |
| Navarre | 0 (0.0) | 2 (1.4) | 2 (1.0) |
| Region of Murcia | 3 (5.7) | 4 (2.8) | 7 (3.6) |
| Valencian community | 7 (13.2) | 12 (8.5) | 19 (9.7) |
| Autonomous city of Ceuta | 0 (0.0) | 1 (0.7) | 1 (0.5) |
| Autonomous city of Melilla | 1 (1.9) | 0 (0.0) | 1 (0.5) |
| Total | 53 | 142 | 195 |

**Supplementary Figure 1:** Formula used to measure the level of consensus


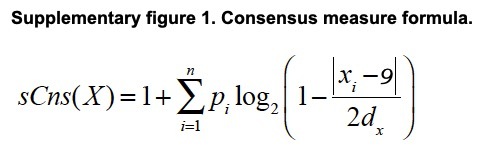

Supplement: Supplementary file 1 [file get_supplementary_file.php]
